# Supplementary material for: Rats exhibit similar biases in foraging and intertemporal choice tasks
Source: eLife journal article supplement (doi:10.7554/elife.48429), 2019-09-18
Supplement: supp [file elife-48429-supp-v1.zip]

harvests per patch

Travel

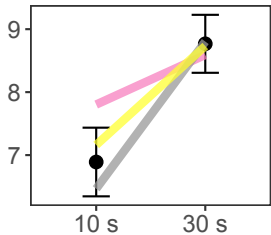

Deplete

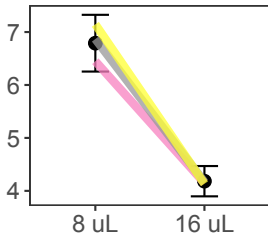

Scale

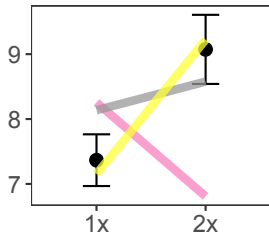

Pre-vs-Post

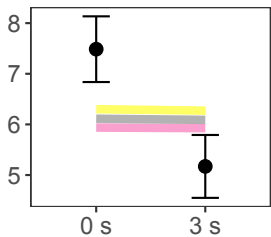

Post-Reward Delay

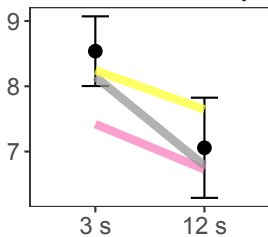

model

cost

util-pwr

util-crra
