# Supplementary material for: Rats exhibit similar biases in foraging and intertemporal choice tasks
Source: eLife journal article supplement (doi:10.7554/elife.48429), 2019-09-18

Trial n

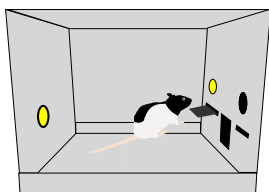

Lever Press

HT

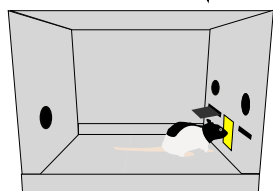

Reward

ITI

Reduce Reward

Trial n+1

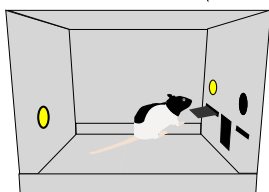

Lever Press

HT

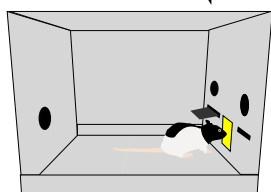

Reward

ITI

Reduce Reward

Trial n+2

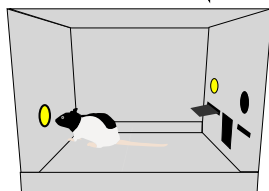

Nose poke

Travel Time

Replenish Reward

Trial n+3

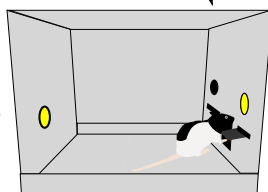

Lever Press

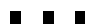

Supplement: supp [file elife-48429-supp-v1.zip]
