# Supplementary figures and images for: Rats exhibit similar biases in foraging and intertemporal choice tasks
Source: eLife journal article supplement (doi:10.7554/elife.48429), 2019-09-18

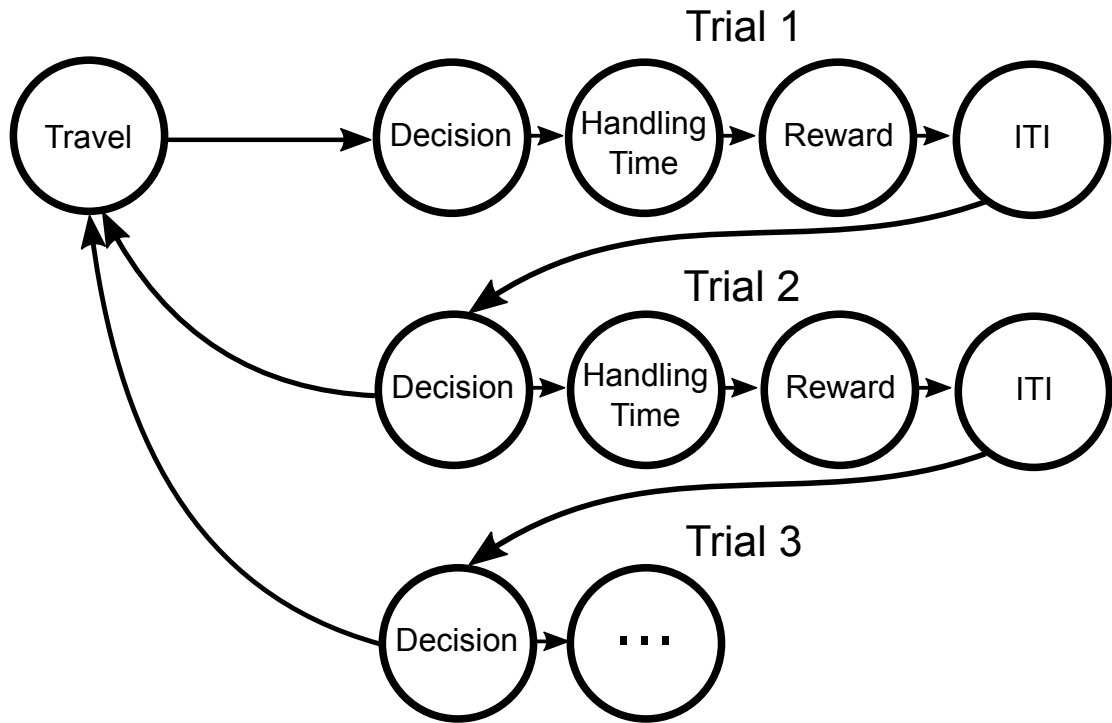

Supplement: supp [file elife-48429-supp-v1.zip]

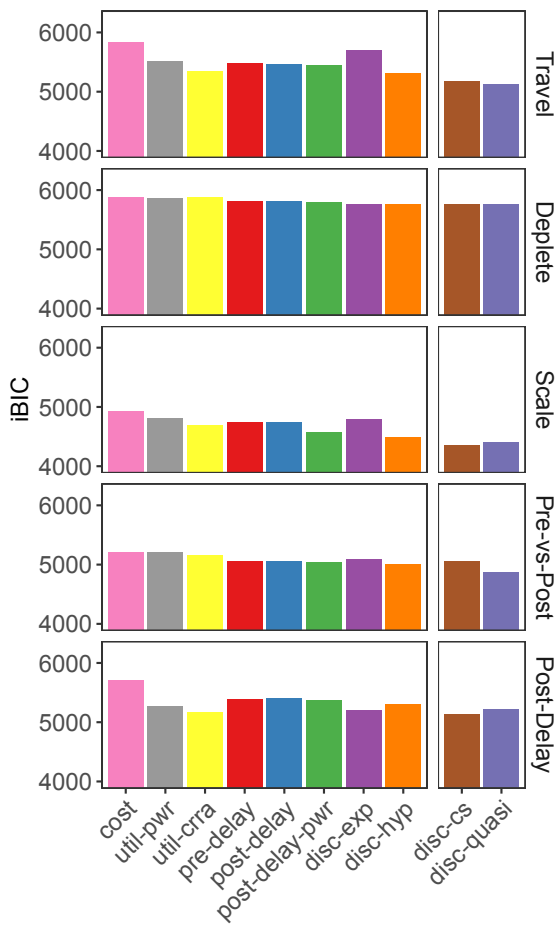

Supplement: supp [file elife-48429-supp-v1.zip]

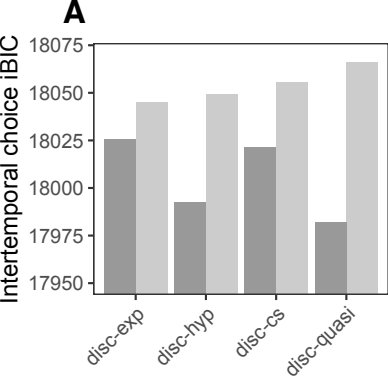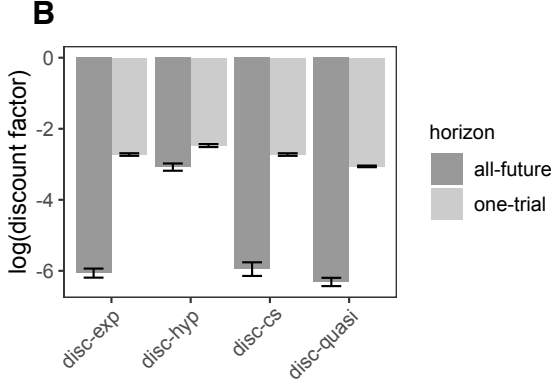

Supplement: supp [file elife-48429-supp-v1.zip]

Trial 1

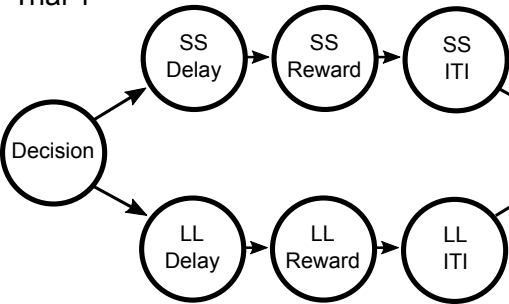

Trial 2

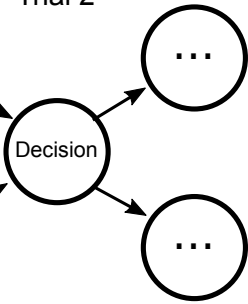

Supplement: supp [file elife-48429-supp-v1.zip]
